# Supplementary material for: Comparative Analysis of Physicochemical Properties and Storability of a New Citrus Variety, Yellowball, and Its Parent
Source: MDPI journal article supplement (doi:10.3390/plants12152863), 2023-08-03
Supplement: s1 [file s1]

# Supplementary Materials

**Table S1.** Weight, width, length, and peel thickness of Haruka, Kiyomi, and Yellowball.

|            | Weight (g)     | Width (cm)   | Length (cm)  | Peel thickness (cm) |
|------------|----------------|--------------|--------------|---------------------|
| Haruka     | 331.49 ± 29.46 | 10.63 ± 0.38 | 10.09 ± 0.42 | 0.90 ± 0.09         |
| Kiyomi     | 250.69 ± 18.83 | 9.39 ± 0.39  | 8.92 ± 0.37  | 0.68 ± 0.12         |
| Yellowball | 273.74 ± 15.47 | 9.76 ± 0.60  | 9.32 ± 0.37  | 0.44 ± 0.03         |

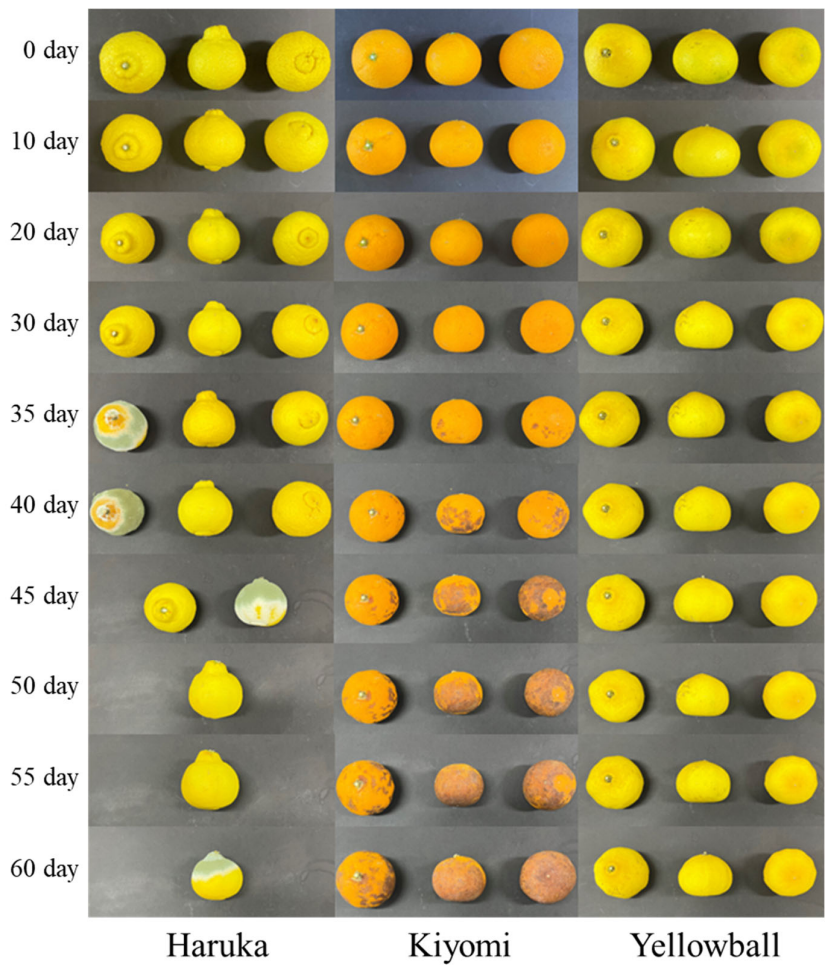

**Figure S1.** Appearance changes in Haruka, Kiyomi, and Yellowball during storage for 60 days at 25 °C.

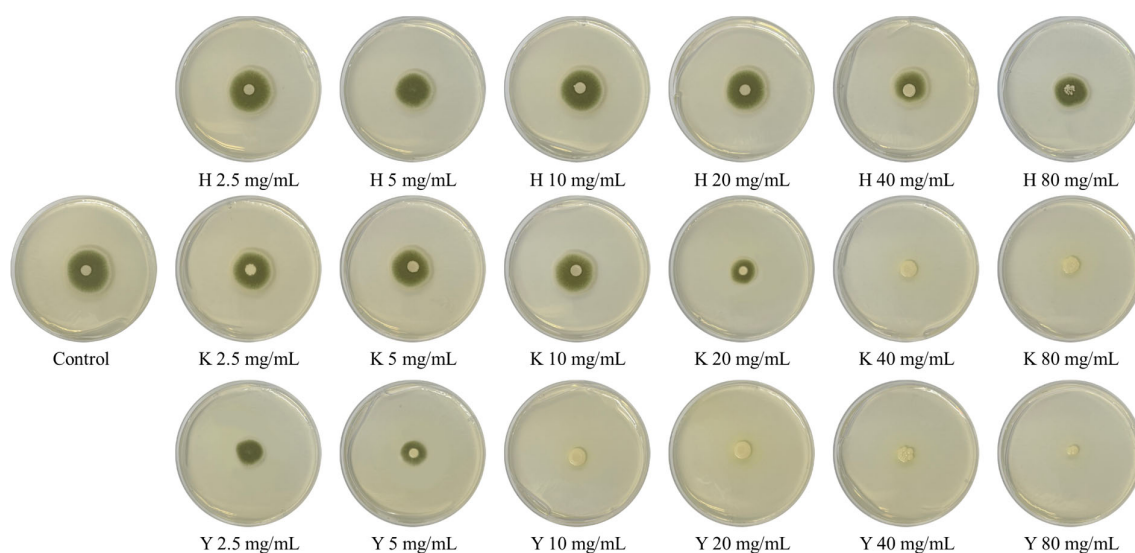

**Figure S2.** Growth inhibition test of peel extracts on citrus green mold (*Penicillium digitatum*) at different concentration (2.5–80 mg/mL). H, haruka; K, Kiyomi; Y, Yellowball.

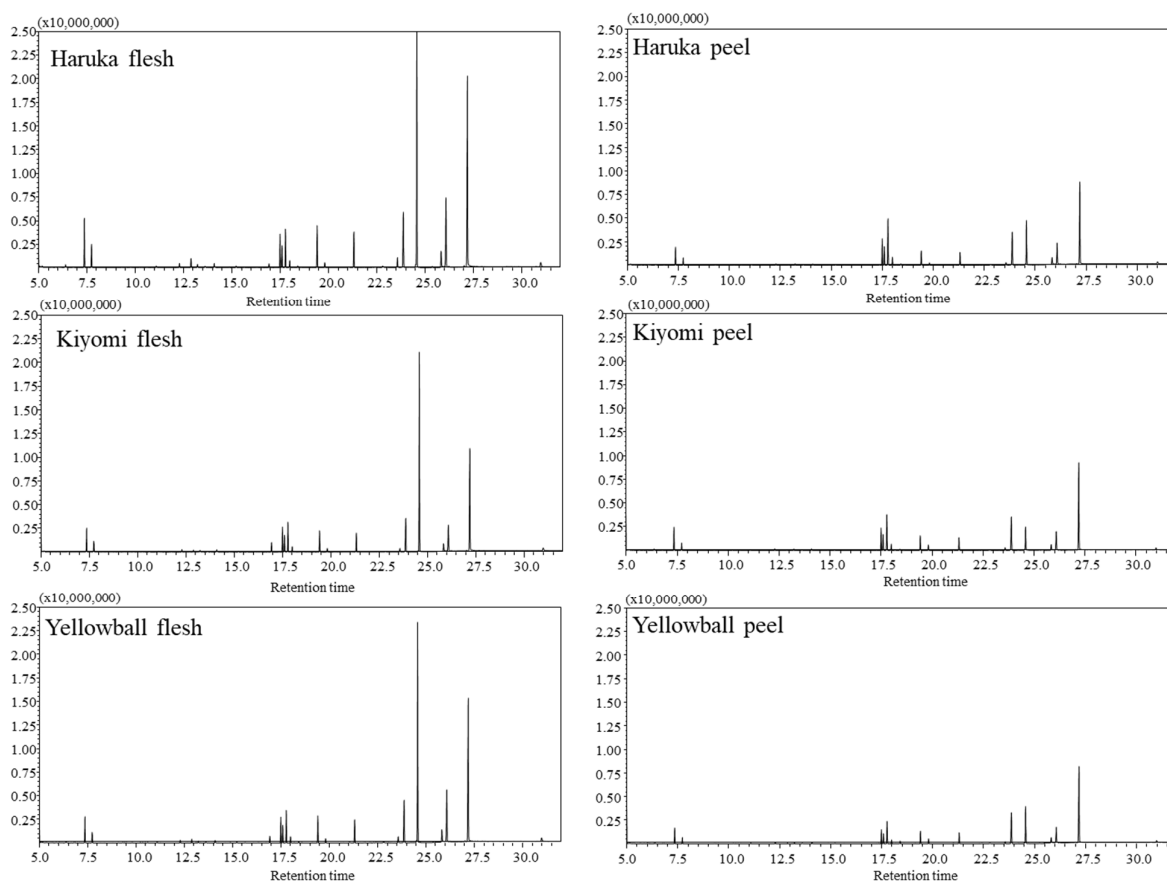

**Figure S3.** Representative chromatograms of citrus metabolites analyzed by GC-MS.

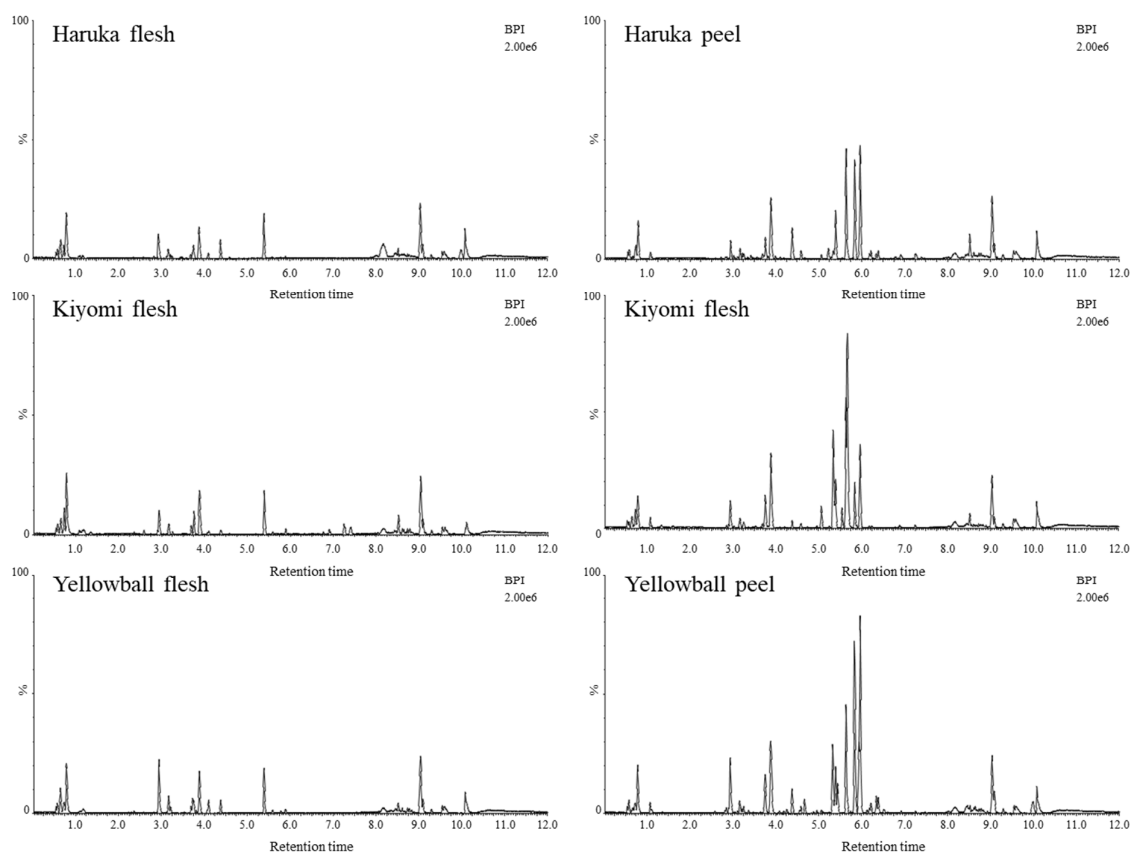

**Figure S4.** Representative chromatograms of citrus metabolites analyzed by UPLC-Q-TOF MS.

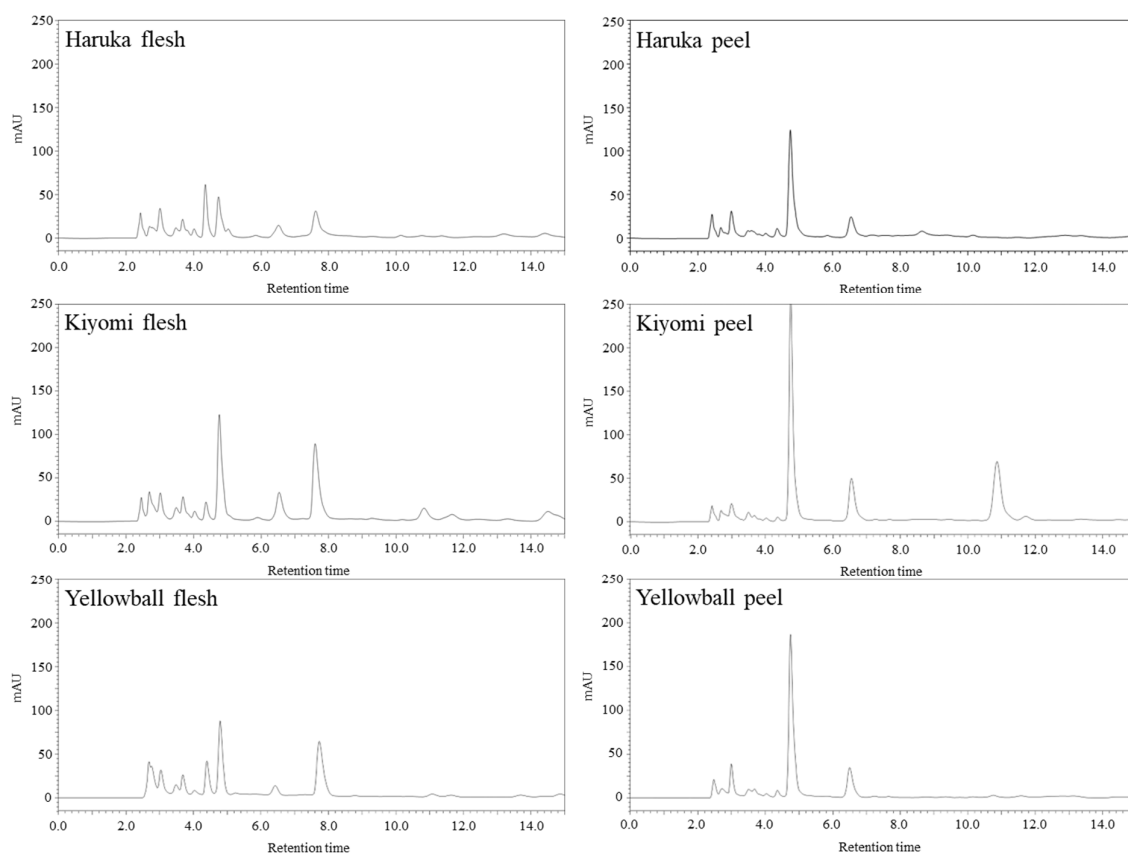

**Figure S5.** Representative chromatograms of organic acids analyzed by HPLC at 220 nm.

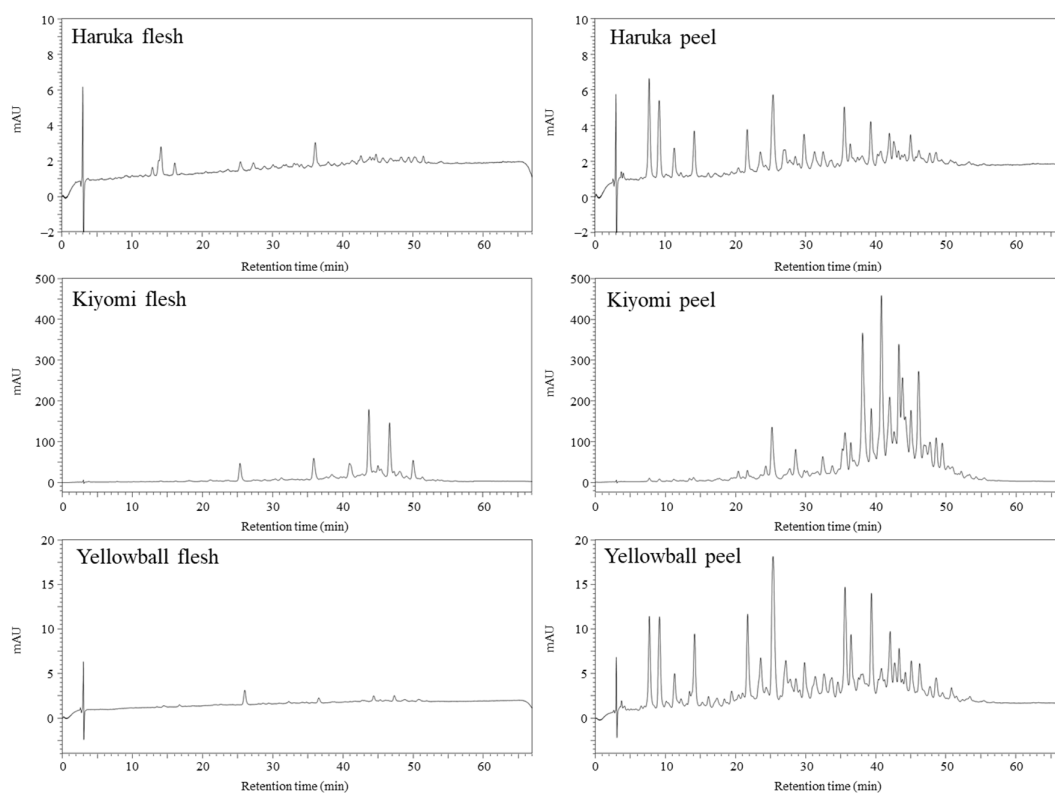

**Figure S6.** Representative chromatograms of carotenoids analyzed by HPLC at 450 nm.

**Table S2.** Identification of major metabolites by GC-MS.

| RT    | Compounds            | RI   | VIP  | <i>p</i> -value        |
|-------|----------------------|------|------|------------------------|
| 6.34  | glycine              | 1051 | 1.21 | $2.45 \times 10^{-2}$  |
| 10.22 | proline              | 1293 | 0.94 | $1.54 \times 10^{-6}$  |
| 13.48 | 4-aminobutanoic acid | 1525 | 1.32 | $1.10 \times 10^{-10}$ |
| 15.21 | aspartic acid        | 1663 | 1.04 | $1.29 \times 10^{-8}$  |
| 17.34 | quinic acid          | 1846 | 1.24 | $7.17 \times 10^{-20}$ |
| 17.49 | fructose             | 1860 | 1.16 | $3.90 \times 10^{-5}$  |
| 17.77 | glucose              | 1885 | 1.35 | $7.10 \times 10^{-7}$  |
| 18.14 | methyl galactoside   | 1920 | 1.06 | $2.17 \times 10^{-19}$ |
| 19.41 | palmitic acid        | 2022 | 0.81 | $2.32 \times 10^{-10}$ |
| 19.80 | <i>myo</i> -inositol | 2042 | 1.25 | $8.03 \times 10^{-13}$ |
| 21.30 | stearic acid         | 2240 | 0.84 | $6.09 \times 10^{-12}$ |
| 24.51 | oleic acid           | 2615 | 1.31 | $1.09 \times 10^{-14}$ |
| 24.57 | sucrose              | 2622 | 1.21 | $8.29 \times 10^{-30}$ |

RT, retention time; RI, retention indices; VIP, variable importance in the projection.

*p*-Values were analyzed by Duncan's test.

**Table S3.** Identification of major metabolites by UPLC-Q-TOF MS.

| RT   | Compounds                                                                                 | Exact mass<br>(M+H) | MS fragment             | VIP  | <i>p</i> -value        |
|------|-------------------------------------------------------------------------------------------|---------------------|-------------------------|------|------------------------|
| 0.64 | arginine                                                                                  | 175.1181            | 70, 158, 116            | 1.27 | $6.60 \times 10^{-28}$ |
| 0.78 | stachydrine                                                                               | 144.1010            | 116, 184, 70, 102, 58   | 1.15 | $6.02 \times 10^{-15}$ |
| 2.59 | phenylalanine                                                                             | 166.0847            | 120, 103                | 1.39 | $2.22 \times 10^{-14}$ |
| 2.90 | tryptophan                                                                                | 205.0959            | 188, 188, 144, 170      | 1.19 | $3.98 \times 10^{-22}$ |
| 2.93 | feruloyl putrescine                                                                       | 265.1533            | 177, 145                | 1.81 | $2.19 \times 10^{-23}$ |
| 3.03 | luteolin-3'-7'-diglucoside                                                                | 611.1608            | 163, 593, 575, 325      | 0.90 | $1.41 \times 10^{-8}$  |
| 3.16 | saponarin                                                                                 | 595.1664            | 577, 475                | 1.33 | $1.91 \times 10^{-4}$  |
| 3.21 | apigenin-7-rutinoside-4'-glucoside                                                        | 741.2250            | 595, 433, 271, 377, 653 | 0.96 | $3.15 \times 10^{-4}$  |
| 3.48 | apioside                                                                                  | 565.1550            | 433, 415, 313, 521      | 1.31 | $2.36 \times 10^{-2}$  |
| 3.68 | zapoterin                                                                                 | 471.2016            | 425, 95                 | 1.19 | $1.55 \times 10^{-6}$  |
| 3.72 | apigenin-7-rutinoside                                                                     | 579.1719            | 271, 433, 519           | 1.77 | $7.64 \times 10^{-15}$ |
| 3.75 | narirutin                                                                                 | 581.1875            | 273, 419, 119           | 0.96 | $1.19 \times 10^{-15}$ |
| 3.88 | hesperidin                                                                                | 611.1973            | 303, 449, 177           | 0.93 | $4.86 \times 10^{-18}$ |
| 4.09 | xylogranatin K                                                                            | 515.2287            | 496, 409                | 1.50 | $5.87 \times 10^{-10}$ |
| 4.37 | didymin                                                                                   | 595.2021            | 287, 433, 559           | 1.19 | $3.53 \times 10^{-12}$ |
| 4.58 | cyclonatsudamine A                                                                        | 728.3989            | 615, 587, 502, 474      | 0.95 | $2.81 \times 10^{-7}$  |
| 4.67 | natsudaiddain derivatives<br>(natsudaiddain 3-(4-O-3-hydroxy-3-methylglutaroylglucoside)) | 725.2313            | 419                     | 1.05 | $2.97 \times 10^{-13}$ |
| 4.73 | monohydroxy tetramethoxyflavone                                                           | 359.1125            | 184                     | 0.88 | $5.36 \times 10^{-8}$  |
| 5.06 | isosinensetin                                                                             | 373.1276            | 343, 358                | 1.08 | $4.13 \times 10^{-28}$ |
| 5.33 | sinensetin                                                                                | 373.1269            | 343, 358                | 1.09 | $4.13 \times 10^{-25}$ |
| 5.63 | nobiletin                                                                                 | 403.1379            | 373, 355                | 0.94 | $1.04 \times 10^{-25}$ |
| 5.66 | tetramethoxyflavone                                                                       | 343.1163            | 313, 282, 299, 281      | 1.08 | $9.13 \times 10^{-23}$ |
| 5.83 | heptamethoxyflavone                                                                       | 433.1489            | 403, 385, 418           | 0.97 | $4.90 \times 10^{-34}$ |
| 5.88 | monohydroxy tetramethoxyflavone                                                           | 359.1123            | 184, 326                | 1.03 | $6.07 \times 10^{-16}$ |
| 5.89 | phytosphingosine                                                                          | 318.3003            | 184, 282                | 1.12 | $5.03 \times 10^{-16}$ |
| 5.93 | natsudaiddain                                                                             | 419.1335            | 184, 389, 371           | 1.17 | $5.29 \times 10^{-38}$ |
| 5.96 | tangeretin                                                                                | 373.1275            | 343, 358                | 0.92 | $1.17 \times 10^{-29}$ |
| 6.17 | monohydroxy pentamethoxyflavone-1                                                         | 389.1235            | 359                     | 1.00 | $7.52 \times 10^{-9}$  |
| 6.21 | heptamethoxyflavone                                                                       | 403.1398            | 184, 373, 355           | 1.13 | $1.96 \times 10^{-22}$ |
| 6.34 | monohydroxy pentamethoxyflavone-2                                                         | 389.1237            | 359, 374, 356, 341      | 1.09 | $3.43 \times 10^{-29}$ |
| 6.38 | 5-hydroxy-3,6,7,8,3',4'-hexamethoxyflavone                                                | 419.1335            | 184, 389, 371           | 1.08 | $6.06 \times 10^{-26}$ |
| 6.90 | LPE(C18:2)                                                                                | 478.2943            | 155, 337, 98, 460       | 1.46 | $2.14 \times 10^{-10}$ |
| 6.92 | LPC(C18:2)                                                                                | 520.3410            | 337, 478, 104           | 1.16 | $1.39 \times 10^{-4}$  |
| 7.24 | LPE(C16:0)                                                                                | 454.2945            | 184, 104, 125           | 1.58 | $1.12 \times 10^{-18}$ |
| 7.27 | LPC(C16:0)                                                                                | 496.3406            | 184, 104, 125           | 1.49 | $2.20 \times 10^{-12}$ |
| 7.39 | LPE(C18:1)                                                                                | 480.3086            | 155, 337, 98, 460       | 1.40 | $4.30 \times 10^{-12}$ |
| 7.41 | LPC(C18:1)                                                                                | 522.3572            | 339, 341, 313, 104, 504 | 1.28 | $2.99 \times 10^{-9}$  |
| 8.63 | pheophorbide A                                                                            | 593.2772            | 184                     | 0.89 | $2.61 \times 10^{-7}$  |
| 9.98 | cholesteryl acetate                                                                       | 429.3728            | 165, 205, 164, 219      | 1.23 | $6.61 \times 10^{-5}$  |

RT, retention time; VIP, variable importance in the projection; LPE, lysophosphatidylethanolamine; LPC, lysophosphatidylcholine.

*p*-Values were analyzed by Duncan's test.

**Table S4.** Identification of major metabolites by HPLC.

|              | RT   | Compounds                         | $\lambda_{\max}$ (nm) | VIP  | $p$ -value             |
|--------------|------|-----------------------------------|-----------------------|------|------------------------|
| Organic acid | 3.1  | oxalic acid                       |                       | 1.39 | $7.11 \times 10^{-7}$  |
|              | 3.5  | tartaric acid                     |                       | 1.12 | $1.68 \times 10^{-21}$ |
|              | 4.4  | malic acid                        |                       | 1.59 | $1.73 \times 10^{-37}$ |
|              | 4.8  | ascorbic acid                     |                       | 1.04 | $2.64 \times 10^{-29}$ |
|              | 5.4  | lactic acid                       |                       | 1.01 | $6.13 \times 10^{-5}$  |
|              | 5.7  | acetic acid                       |                       | 1.45 | $1.68 \times 10^{-13}$ |
|              | 7.7  | maleic acid                       |                       | 1.01 | $3.94 \times 10^{-25}$ |
|              | 7.8  | citric acid                       |                       | 1.30 | $5.90 \times 10^{-39}$ |
|              | 8.8  | succinic acid                     |                       | 1.35 | $1.22 \times 10^{-19}$ |
| Carotenoids  | 9.1  | violaxanthin                      | 421, 448              | 0.77 | $2.05 \times 10^{-7}$  |
|              | 11.2 | neoxanthin                        | 436, 464              | 0.70 | $2.35 \times 10^{-7}$  |
|              | 13.4 | lutein                            | 400, 422              | 0.92 | $8.33 \times 10^{-8}$  |
|              | 14.1 | zeaxanthin                        | 422                   | 0.84 | $7.98 \times 10^{-5}$  |
|              | 25.3 | $\beta$ -cryptoxanthin            | 451, 477              | 1.09 | $4.83 \times 10^{-8}$  |
|              | 35.6 | $\alpha$ -carotene                | 446, 474              | 0.87 | $4.38 \times 10^{-5}$  |
|              | 38.1 | $\beta$ -carotene                 | 436, 464              | 1.00 | $3.98 \times 10^{-14}$ |
|              | 39.3 | 9- <i>cis</i> - $\beta$ -carotene | 439, 469              | 0.84 | $1.79 \times 10^{-4}$  |

RT, retention time; VIP, variable importance in the projection.

$p$ -Values were analyzed by Duncan's test.
